# Supplementary material for: Studying Respiratory Symptoms Related to Swimming Pools Attendance in Young Athletes: The SPHeRA Study
Source: MDPI journal article supplement (doi:10.3390/toxics10120759), 2022-12-06
Supplement: s1 [file s1]

**Table S1.** Results of simple logistic regression analysis in all the participants.

| Outcomes                    | Predictors                     | TOTAL            |                |
|-----------------------------|--------------------------------|------------------|----------------|
|                             |                                | OR (95%CI)       | <i>p-value</i> |
| Nasal congestion/rhinorrhea | Age                            | 1.01 (0.95-1.07) | 0.816          |
|                             | Sex                            | 1.45 (0.97-2.15) | 0.067          |
|                             | Years of practice              | 1.00 (0.94-1.06) | 0.977          |
|                             | Training sessions per week     | 1.02 (0.91-1.15) | 0.727          |
|                             | Hours of training per session  | 1.90 (0.99-3.65) | 0.054          |
|                             | Distance swum per session (Km) | 1.07 (0.94-1.22) | 0.285          |
|                             | Hours of training per week     | 1.02 (0.98-1.07) | 0.296          |
|                             | Indoor training                | 0.71 (0.45-1.12) | 0.138          |
|                             | Diagnosed asthma               | 1.28 (0.66-2.51) | 0.463          |
|                             | Diagnosed allergic diseases    | 2.03 (1.24-3.31) | 0.005          |
| Coughing                    | Age                            | 0.94 (0.88-1.01) | 0.098          |
|                             | Sex                            | 1.08 (0.72-1.61) | 0.712          |
|                             | Years of practice              | 0.97 (0.91-1.03) | 0.287          |
|                             | Training sessions per week     | 0.96 (0.86-1.09) | 0.558          |
|                             | Hours of training per session  | 2.14 (1.10-4.17) | 0.024          |
|                             | Distance swum per session (Km) | 1.17 (1.02-1.34) | 0.025          |
|                             | Hours of training per week     | 1.01 (0.97-1.06) | 0.580          |
|                             | Indoor training                | 0.46 (0.28-0.75) | 0.002          |
|                             | Diagnosed asthma               | 2.58 (1.29-5.15) | 0.007          |
|                             | Diagnosed allergic diseases    | 1.69 (1.04-2.74) | 0.034          |
| Breathing difficulty        | Age                            | 1.01 (0.94-1.08) | 0.755          |
|                             | Sex                            | 1.27 (0.81-2.01) | 0.297          |
|                             | Years of practice              | 1.06 (0.99-1.14) | 0.081          |
|                             | Training sessions per week     | 1.06 (0.93-1.21) | 0.405          |
|                             | Hours of training per session  | 2.34 (1.12-4.91) | 0.024          |
|                             | Distance swum per session (Km) | 1.09 (0.94-1.27) | 0.260          |

|                                      |                  |        |
|--------------------------------------|------------------|--------|
| Hours of training<br>per <b>week</b> | 1.04 (0.99-1.10) | 0.088  |
| Indoor training                      | 0.67 (0.39-1.17) | 0.164  |
| Diagnosed<br>asthma                  | 2.72 (1.37-5.41) | 0.004  |
| Diagnosed<br>allergic diseases       | 2.96 (1.77-4.95) | <0.001 |
